# Supplementary material for: A Review of SARS-CoV-2, Responsible for COVID-19: History, Biology, Infection Mechanism, Antigenic Vaccines, Their Risks and how an Alternate RBD Vaccine is Safer?
Source: Preprints.org preprint supplement (doi:10.20944/preprints202106.0377.v2), 2021-06-22
Supplement: Supplementary file 1 [file supplementary]

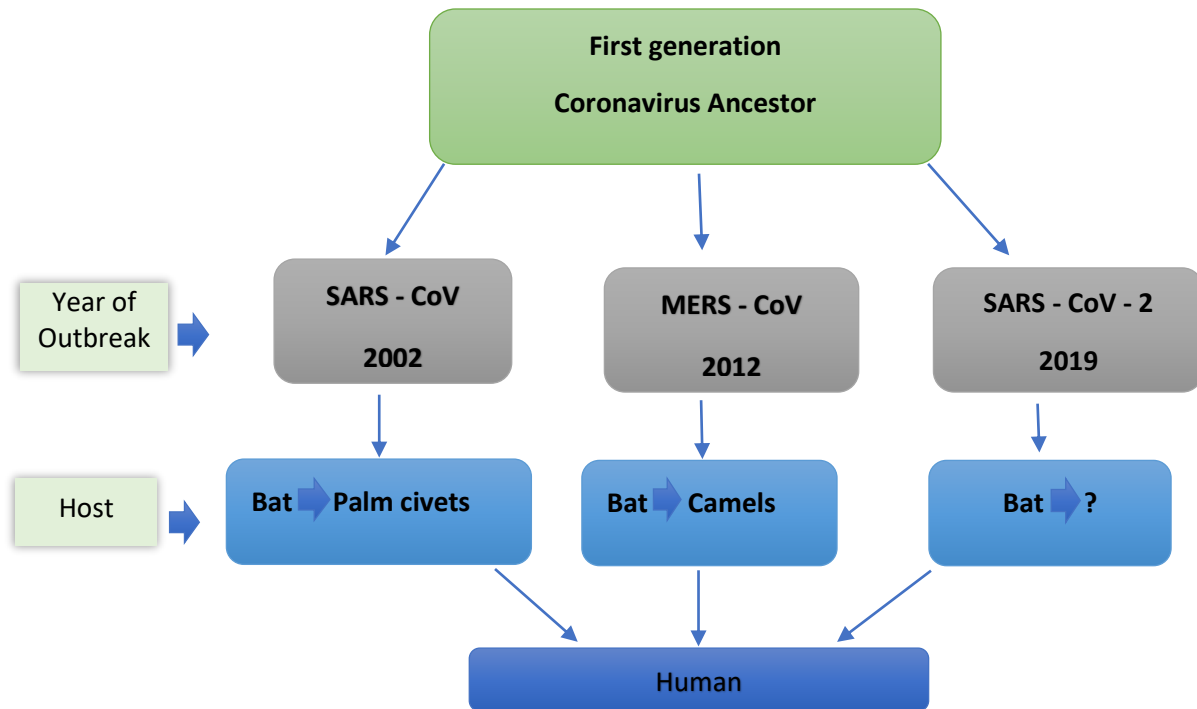

Figure 1. Transmission pattern of coronavirus outbreaks 2002 - 2019 [9,32]:  
SARS-CoV (2002) Bat → Palm civets → Human;  
MERS-CoV (2012) Bat → Camels → Human;  
SARS-CoV-2 (2019) Bat → ? → Human.
